# Supplementary material for: Ras-Induced Changes in H3K27me3 Occur after Those in Transcriptional Activity
Source: PLoS Genet. 2013 Aug 29;9(8):e1003698. doi: 10.1371/journal.pgen.1003698 (PMC3757056; doi:10.1371/journal.pgen.1003698)
Supplement: Table S1 — Illumina sequencing information. Sequencing throughput and filtering summary of RNA-seq and ChIP-seq analyses of samples at various times after Ras induction. (XLSX) [file pgen.1003698.s011.xlsx]

## Sheet: Table S1
Table S1	Illumina sequencing information
	RNA-Seq		RNA-Seq
	Average	Total	Ras0	Ras2	Ras4	Ras7	Ras12
# sequenced reads	8.18773e+07	409386518	80756676	87593446	73969370	84627166	82439860
# mapped reads	7.93902e+07	396951122	78381162	85038187	71611341	82041164	79879268
% mapped reads	96.9624	n.d.	97.0584	97.0828	96.8122	96.9442	96.894
	ChIP-Seq		ChIP-Seq
	Average	Total	IP-Ras0	IP-Ras2	IP-Ras4	IP-Ras7	IP-Ras12	Input-Ras0
# sequenced reads	1068022370	6408134220	1175453298	831252954	1056591672	1115563522	900106072	1329166702
# mapped reads	1.04476e+09	6268565653	1151613546	817043691	1021469721	1095022521	881401677	1302014497
% mapped reads	97.822	n.d.	97.9719	98.2906	96.6759	98.1587	97.922	97.9572
# reads after after filtering	8.70116e+08	5220698971	961513897	690771038	875717164	914670167	728976347	1049050358
% reads after after filtering	83.2838	n.d.	83.4928	84.5452	85.7311	83.5298	82.7065	80.5713
#; the number of
